# Supplementary material
Source: Springer Nature journal article supplement (https://www.springermedizin.de/resource/supplementary/12894_2005_67_MOESM3_ESM.pdf/9513848)

Control

BTX-A

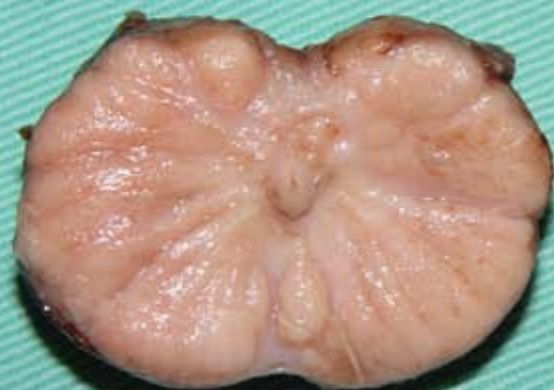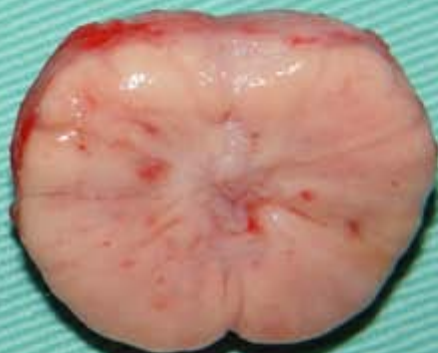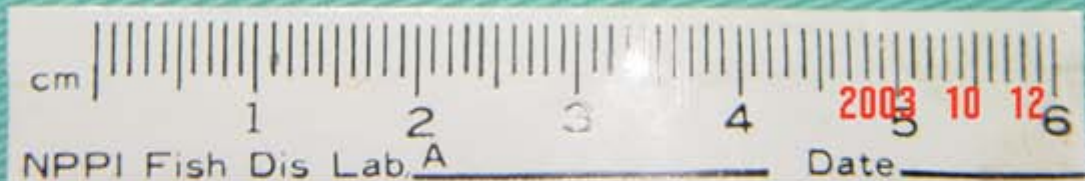

Supplement: MOESM3 [file 9513848]
